# Supplementary material
Source: PubMed Central journal article supplement (PMC10924681)
Supplement: EMS194097-supplement-Supplementary_data.pdf [file EMS194097-supplement-Supplementary_data.pdf]

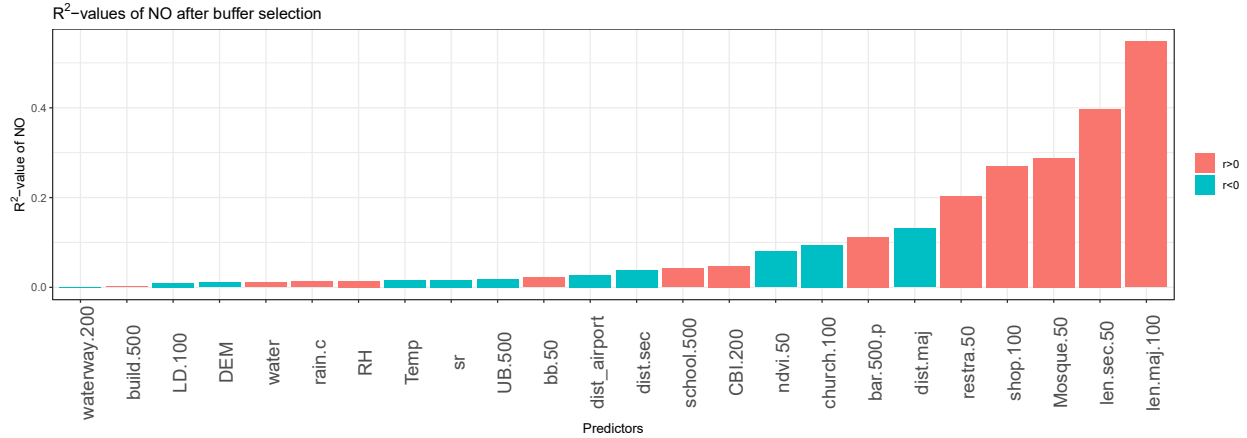

**Figure S3.** Predictor variables for NO after buffer selection.

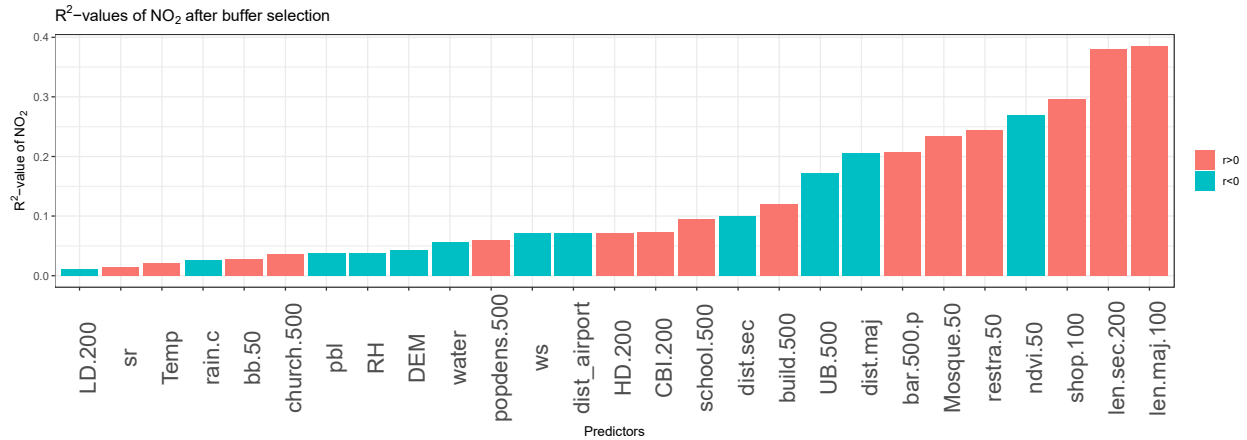

**Figure S4.** Predictor variables for NO<sub>2</sub> after buffer selection.

Abbreviations: **LD** = low density; **sr** = solar radiation; **Temp** = temperagure; **rain.c** = counts of rained days; **bb.50** = number of biomass burning family within 50 meters; **church.500** = church number within 500 meters; **pbl** = planetary boundary layer height; **RH** = relative humidity; **DEM** = digital elevation model; **water** = water vapor mixing ratio; **popdens.500** = population density within 500 meters; **ws** = wind speed; **dist\_airport** = distant to the airport; **HD.200** = area of high density within 200 meter; **CBI.200** = area of commercial/business/industrial within 200 meters; **dist.sec** = distant to secondary road; **bar.500.p** = present of bar within 500 meters; **Mosque.50** = Mosque number within 50 meters; **resta.50** = restaurant number within 50 meters; **ndvi.50** = normalized difference vegetation index within 50 meters; **len.sec.200** = length of secondary road within 200 meters; **len.maj.200** = length of major road within 200 meters

**Table S1.** Supervised stepwise forward selection results of the NO and NO<sub>2</sub> LUR models

| NO Model                               |                | NO <sub>2</sub> model                   |                |
|----------------------------------------|----------------|-----------------------------------------|----------------|
| Predictors                             | R <sup>2</sup> | Predictors                              | R <sup>2</sup> |
| Total length of major roads (100 m)    | 0.52           | NDVI (50 m)                             | 0.28           |
| Total length of secondary roads (50 m) | 0.62           | Total length of secondary roads (200 m) | 0.44           |
| Calendar month                         | 0.65           | wind speed                              | 0.53           |
| Solar radiation in a calendar week     | 0.66           | Total length of major roads (100 m)     | 0.58           |
| Presence of bar (500 m)                | 0.66           | Relative humidity                       | 0.60           |
| –                                      | –              | Calendar month                          | 0.62           |

**Table S2.** Estimates of population number and percentage living in enumeration areas with different levels of NO<sub>2</sub> exposure ( $\mu\text{g}/\text{m}^3$ ) in the Accra Metropolitan Area (AMA). Population data is from the 2010 national census.

| NO <sub>2</sub> ( $\mu\text{g}/\text{m}^3$ ) | Annual                           |                         | Harmattan                        |                         | non-Harmattan                    |                         |
|----------------------------------------------|----------------------------------|-------------------------|----------------------------------|-------------------------|----------------------------------|-------------------------|
|                                              | Percentage of the AMA population | Number of people in AMA | Percentage of the AMA population | Number of people in AMA | Percentage of the AMA population | Number of people in AMA |
| < 40                                         | 2.2%                             | 36,760                  | < 1%                             | 10,970                  | 6%                               | 100,360                 |
| 40-50                                        | 4.4%                             | 74,190                  | 1%                               | 19,650                  | 19%                              | 323,150                 |
| 50-60                                        | 22%                              | 368,950                 | 2%                               | 28,609                  | 37%                              | 622,150                 |
| 60-70                                        | 36%                              | 600,740                 | 8%                               | 128,290                 | 23%                              | 387,940                 |
| 70-80                                        | 22%                              | 364,370                 | 3%                               | 551,150                 | 8%                               | 132,830                 |
| 80-90                                        | 8%                               | 132,410                 | 31%                              | 509,950                 | 5%                               | 80,460                  |
| 90-100                                       | 4%                               | 71,470                  | 16%                              | 261,580                 | < 1%                             | 15,020                  |
| >100                                         | < 1%                             | 16,230                  | 9%                               | 154,840                 | <1 %                             | 3,210                   |

**Table S3. Estimated NO<sub>2</sub> exposure in the Accra Metropolitan Area (AMA) enumeration area (EA) with different socio-economic status (SES) distribution\*.** Data summarized as medians and interquartile ranges.

| SES                 | NO <sub>2</sub> (µg/m <sup>3</sup> ) |
|---------------------|--------------------------------------|
| High SES EAs        | 60 (53, 68)                          |
| Medium-high SES EAs | 63 (58, 69)                          |
| Medium SES EAs      | 66 (60, 73)                          |
| Medium-low SES EAs  | 68 (61, 77)                          |
| Low SES EAs         | 73 (66, 80)                          |

\*SES is based on median household consumption (GHC) within EAs <sup>51</sup>. Quintiles were generated from median EA consumption values within the AMA.
